# Supplementary material for: Synthesis and Biological Evaluation of Halogenated E-Stilbenols as Promising Antiaging Agents
Source: MDPI journal article supplement (doi:10.3390/molecules25235770), 2020-12-07

## Supporting Information

*Article*

# Synthesis and Biological Evaluation of Halogenated *E*-Stilbenols as Promising Antiaging Agents

Ester Sara Di Filippo <sup>1,†</sup>, Letizia Giampietro <sup>2,†</sup>, Barbara De Filippis <sup>2,\*</sup>, Marwa Balaha <sup>2,3</sup>,  
Vincenzo Ferrone <sup>2</sup>, Marcello Locatelli <sup>2</sup>, Tiziana Pietrangelo <sup>1</sup>, Angela Tartaglia <sup>2</sup>,  
Rosa Amoroso <sup>2</sup> and Stefania Fulle <sup>1</sup>

<sup>1</sup> Department of Neuroscience Imaging and Clinical Sciences, Interuniversity Institute of Myology, University “G. d’Annunzio” of Chieti-Pescara, 66100 Chieti, Italy; es.difilippo@unich.it (E.S.D.F.); tiziana.pietrangelo@unich.it (T.P.); sfulle@unich.it (S.F.)

<sup>2</sup> Department of Pharmacy, University “G. d’Annunzio” of Chieti-Pescara, 66100 Chieti, Italy; letizia.giampietro@unich.it (L.G.); marwa.balaha@pharm.tanta.edu.eg (M.B.); Vincenzo.ferrone@unich.it (V.F.); marcello.locatelli@unich.it (M.L.); angela.tartaglia@unich.it (A.T.); rosa.amoroso@unich.it (R.A.)

<sup>3</sup> Department of Pharmaceutical Chemistry, Faculty of Pharmacy, Kafrelsheikh University, Kafr El Sheikh 33516, Egypt

\* Correspondence: barbara.defilippis@unich.it; Tel.: +39-0871-3554685

† These authors contributed equally to this work

### Log P studies

All chemical standards were synthesized in our laboratory as reported above. RSV (>99% purity grade) was obtained from Sigma-Aldrich (Milan, Italy). Methanol (HPLC-grade) was purchased from Honeywell (New Jersey, USA). Deionized water (18.2MΩ-cm at 25 °C) was generated by a Millipore Milli-Q Plus water (Millipore Bedford Corp., Bedford, MA, USA).

### Sample preparation

Stock solutions of each compound were prepared as follow: 1 mg of the synthesized compound and RSV (control) was weighted and dissolved in 1 mL of dimethyl sulfoxide (DMSO). The working solutions were prepared in methanol at 100 µg/mL. 20 µL of working solutions was injected in HPLC system without pre-treatment.

### Chromatographic conditions

The HPLC analyses for all new compounds were carried out in isocratic conditions with Milli-Q Water (18.2 MΩ-cm at 25 °C) as solvent A and MeOH as solvent B in different percentages reported in **Table 5**. RP-C18 stationary phase (LiChrosorb C<sub>18</sub>, 150x4.6 mm, 5µm) column was used. All compounds were detected at their maximum wavelength: 322 nm for **1**, 301 nm for **2**, 324 nm for **3**, 324 nm for **4**, 373 nm for **5**, 322 nm for **6**, 320 nm for **7**, whereas RSV was detected at 306 nm. The total run time was kept until sample elution.

**Table 1.** Different tested mobile phase percentages.

| FLOW RATE<br>(mL/min) | % A<br>H <sub>2</sub> O Milli-Q | % B<br>Methanol |
|-----------------------|---------------------------------|-----------------|
| 1                     | 20                              | 80              |
| 1                     | 25                              | 75              |
| 1                     | 30                              | 70              |
| 1                     | 35                              | 65              |
| 1                     | 40                              | 60              |
| 1                     | 50                              | 50              |
| 1                     | 60                              | 40              |
| 1                     | 70                              | 30              |
| 1                     | 75                              | 25              |
| 1                     | 80                              | 20              |

All chromatograms detected at the maximum wavelength, the peak area and the purity (%) of new synthesized compounds are showed in **Figures S1 to S8**.

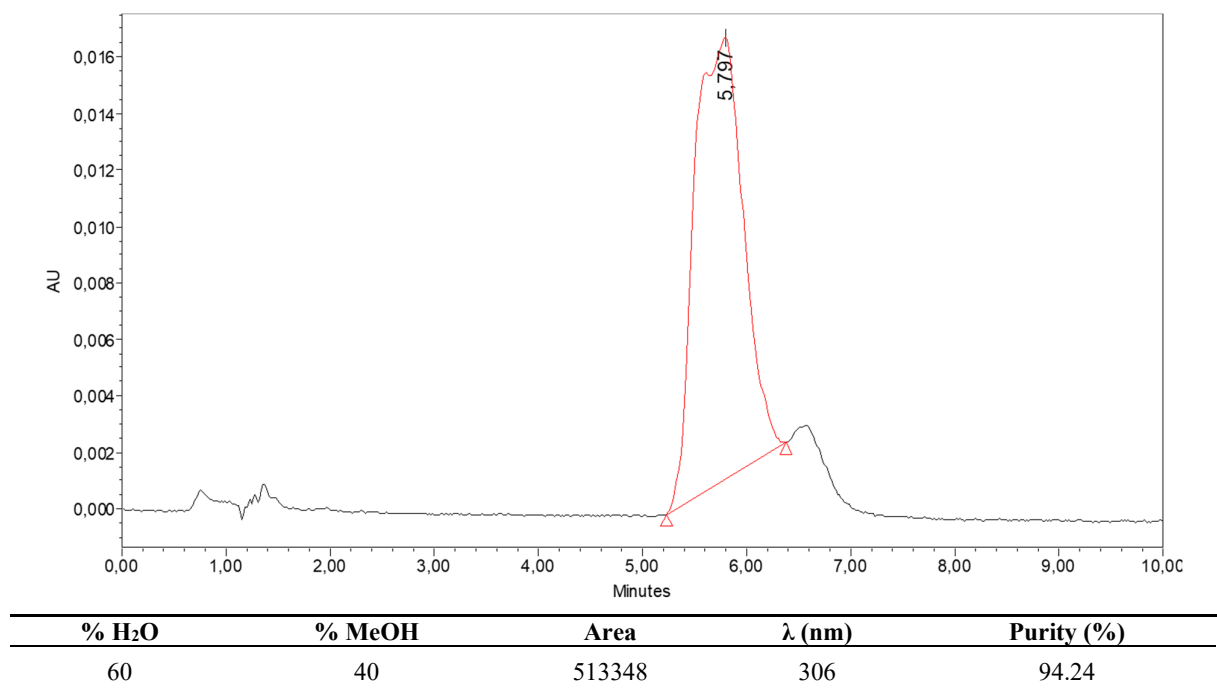

Figure 1. Chromatogram of RSV.

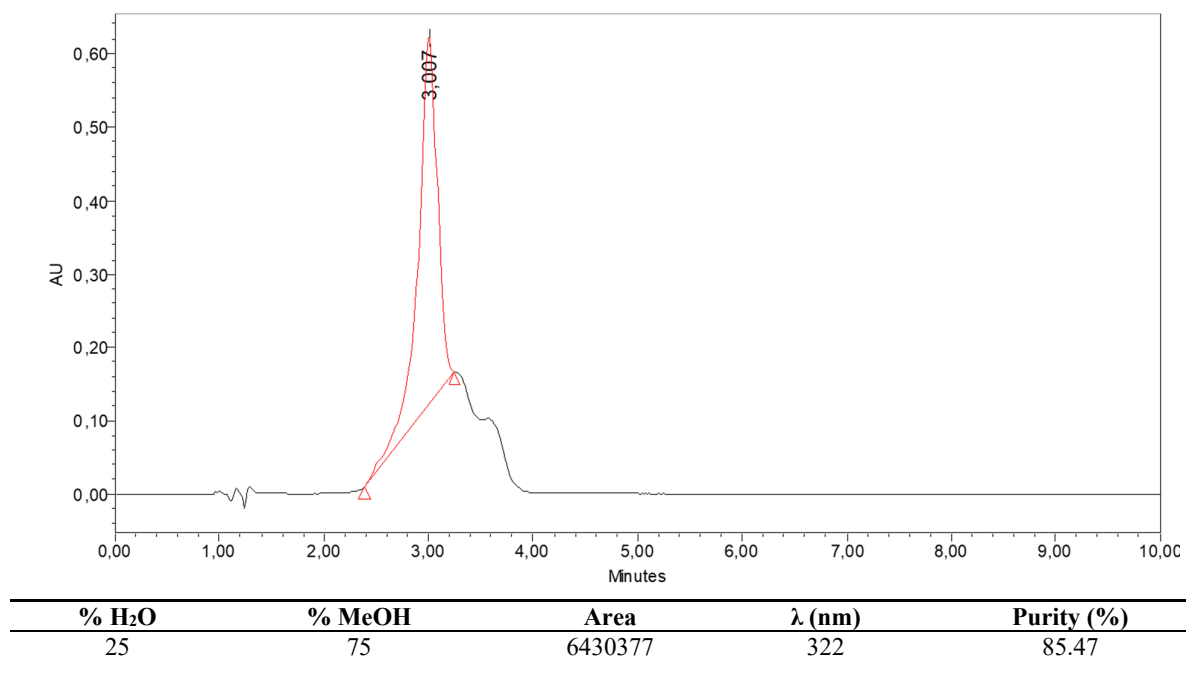

Figure 2. Chromatogram of compound 1.

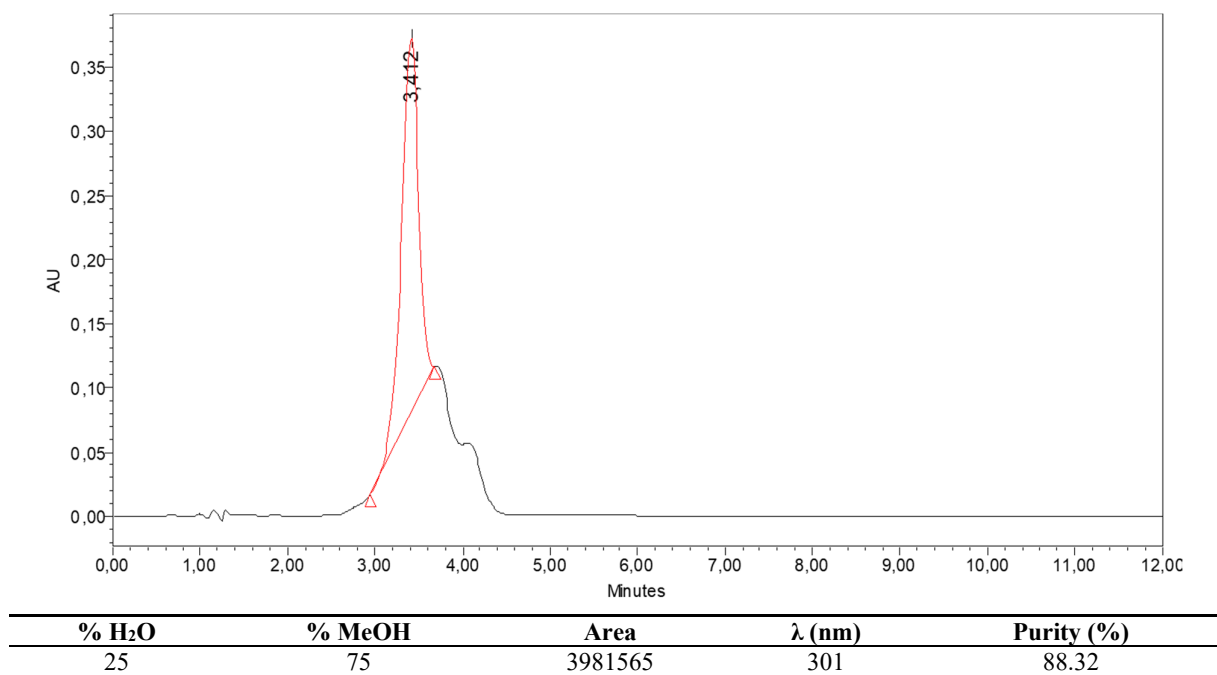

Figure 3. Chromatogram of compound 2.

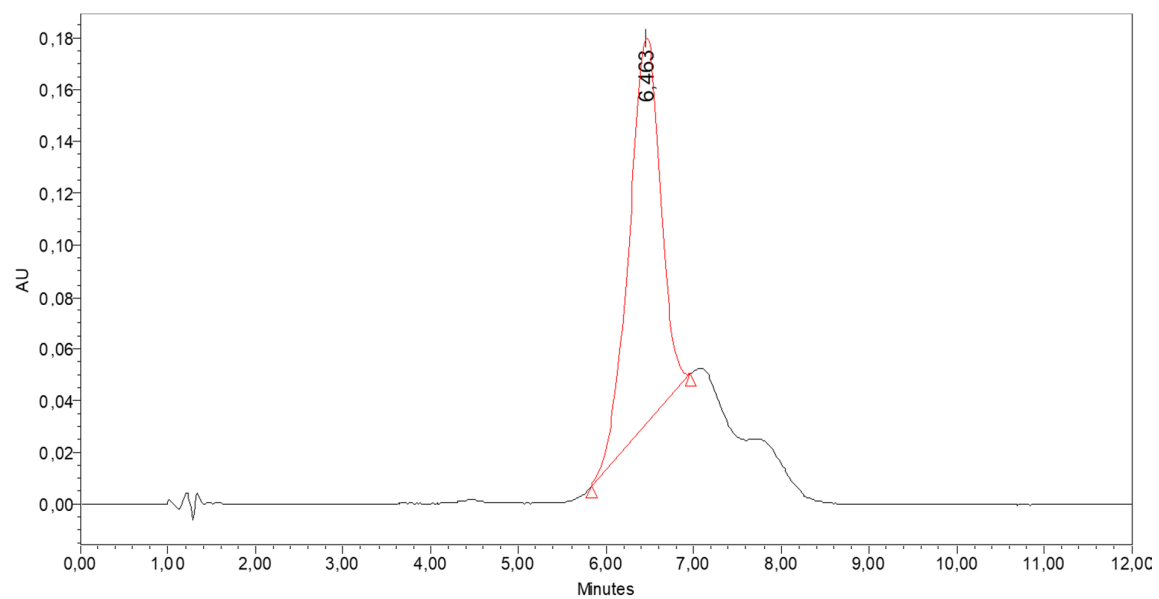

| % H <sub>2</sub> O | % MeOH | Area    | $\lambda$ (nm) | Purity (%) |
|--------------------|--------|---------|----------------|------------|
| 25                 | 75     | 3141407 | 324            | 69.40      |

Figure 4. Chromatogram of compound 3.

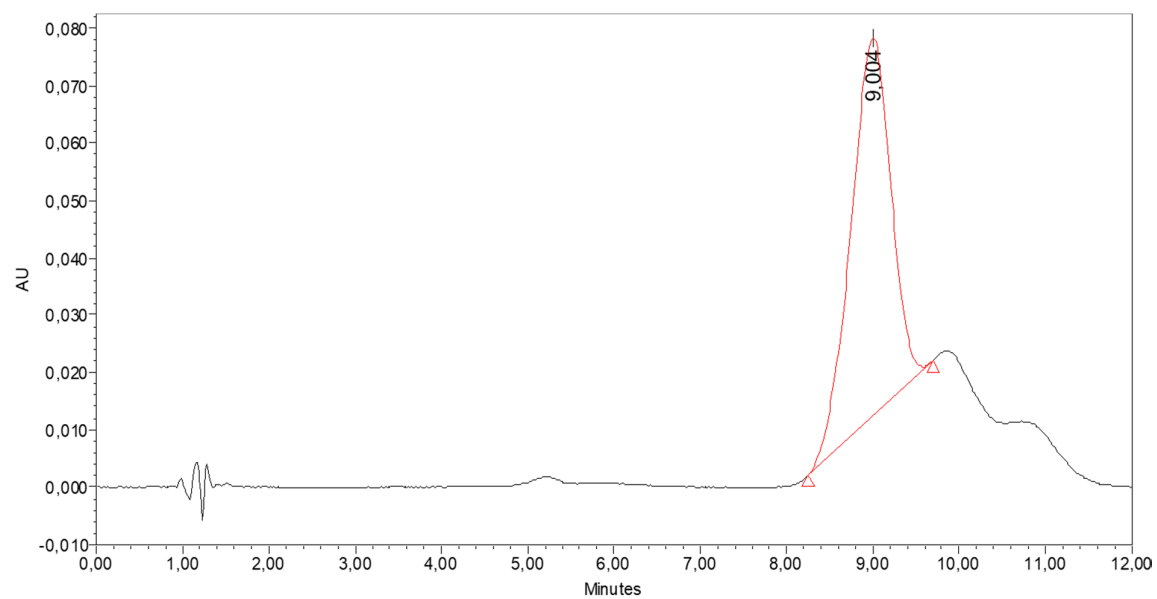

| % H <sub>2</sub> O | % MeOH | Area    | $\lambda$ (nm) | Purity (%) |
|--------------------|--------|---------|----------------|------------|
| 25                 | 75     | 2129280 | 324            | 79.91      |

Figure 5. Chromatogram of compound 4.

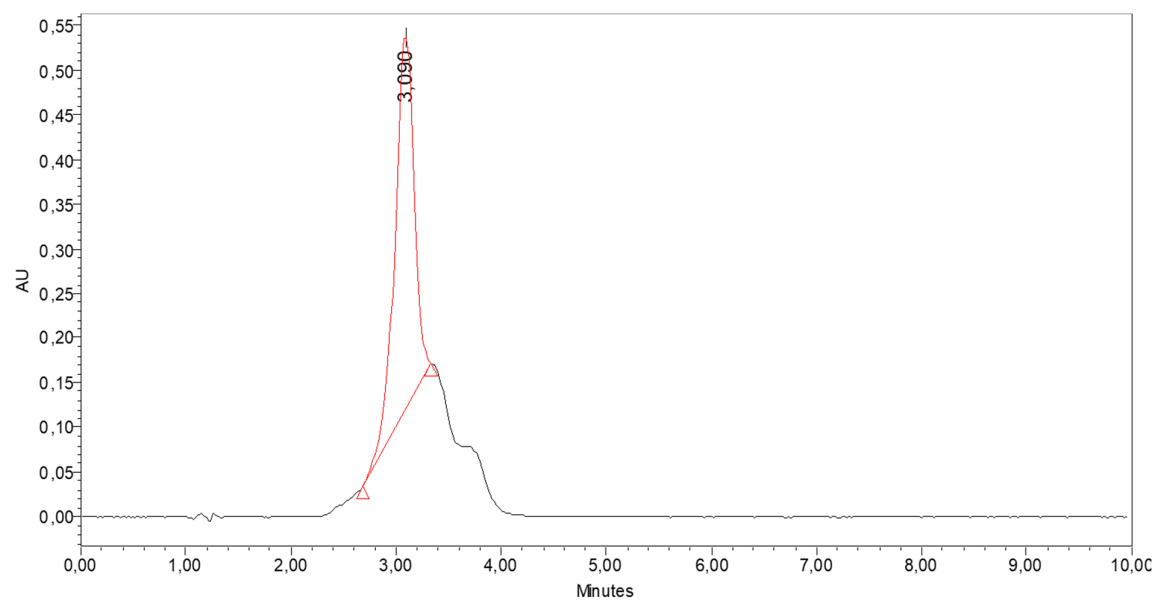

| % H <sub>2</sub> O. | % MeOH | Area    | $\lambda$ (nm) | Purity (%) |
|---------------------|--------|---------|----------------|------------|
| 25                  | 75     | 5232835 | 373            | 93.31      |

Figure 6. Chromatogram of compound 5.

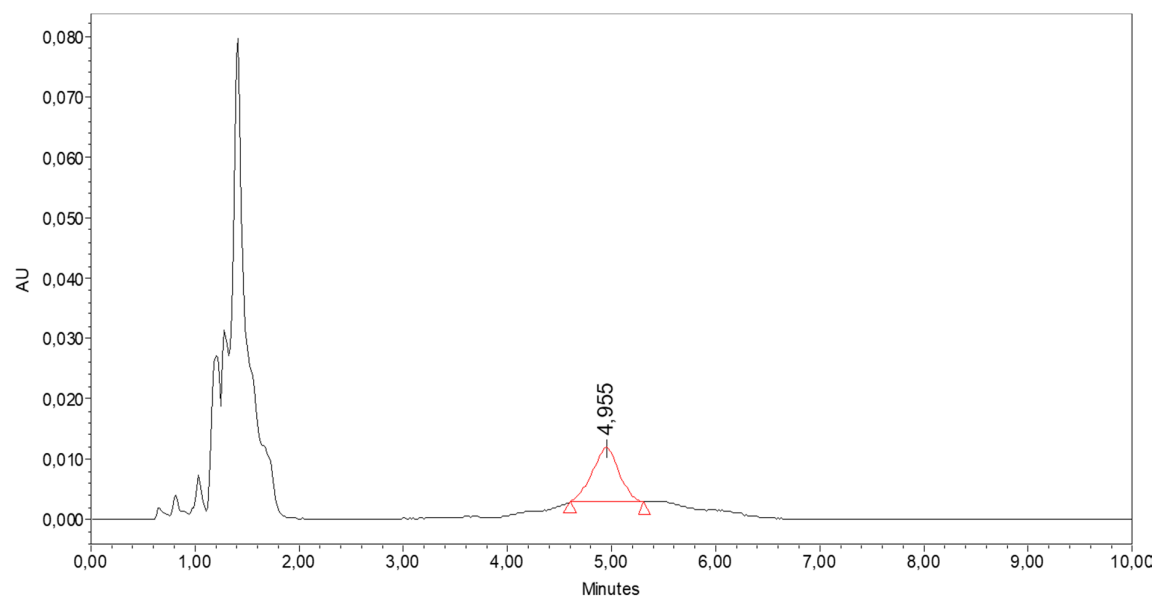

| % H <sub>2</sub> O | % MeOH | Area   | $\lambda$ (nm) | Purity (%) |
|--------------------|--------|--------|----------------|------------|
| 25                 | 75     | 158468 | 322            | 15.25      |

Figure 7. Chromatogram of compound 6.

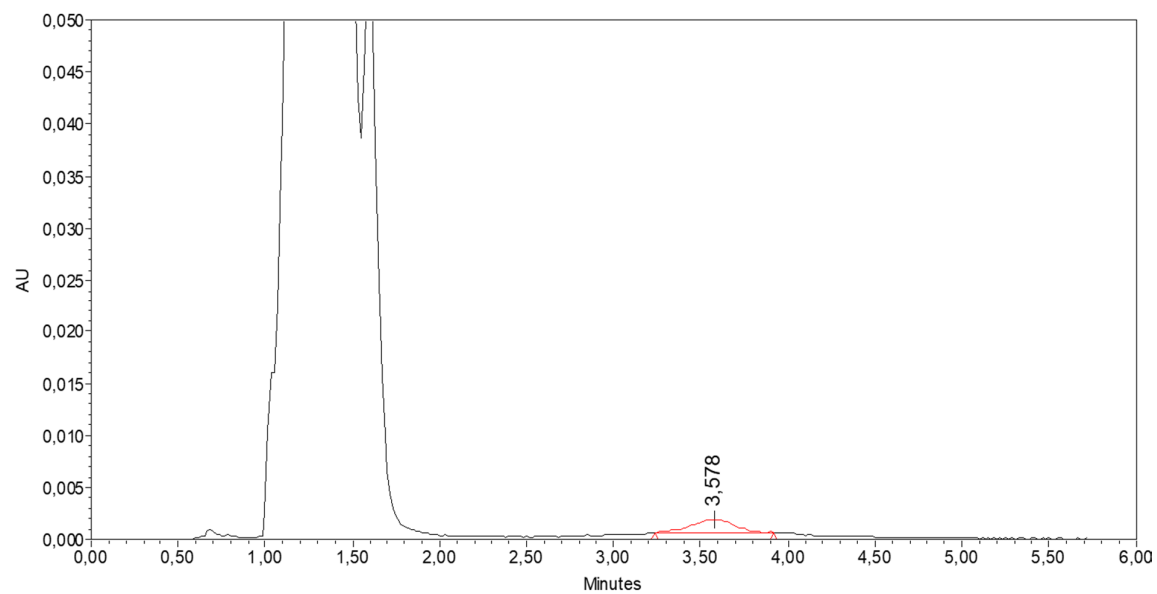

| % H <sub>2</sub> O | % MeOH | Area  | $\lambda$ (nm) | Purity (%) |
|--------------------|--------|-------|----------------|------------|
| 25                 | 75     | 21044 | 320            | 0.73       |

Figure 8. Chromatogram of compound 7.

Ethylindanone standard test sample  
Recorded on 400-MR with OneNMH probe and PZT tuning

## Compound 1

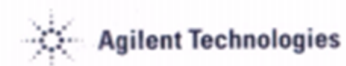

Sample Name:  
DF1277A\_p-Cl-PhOH\_  
Data Collected on:  
m300-mercury300  
Archive directory:  
/export/home/chempack/vnmrsys/data  
Sample directory:

FidFile: PROTON

Pulse Sequence: PROTON (s2pul)  
Solvent: cdcl3  
Data collected on: Jan 27 2020

Operator: defil

Relax. delay 1.000 sec  
Pulse 45.0 degrees  
Acq. time 1.706 sec  
Width 4803.1 Hz  
128 repetitions  
OBSERVE H1, 300.1976543 MHz  
DATA PROCESSING  
FT size 16384  
Total time 5 min 55 sec

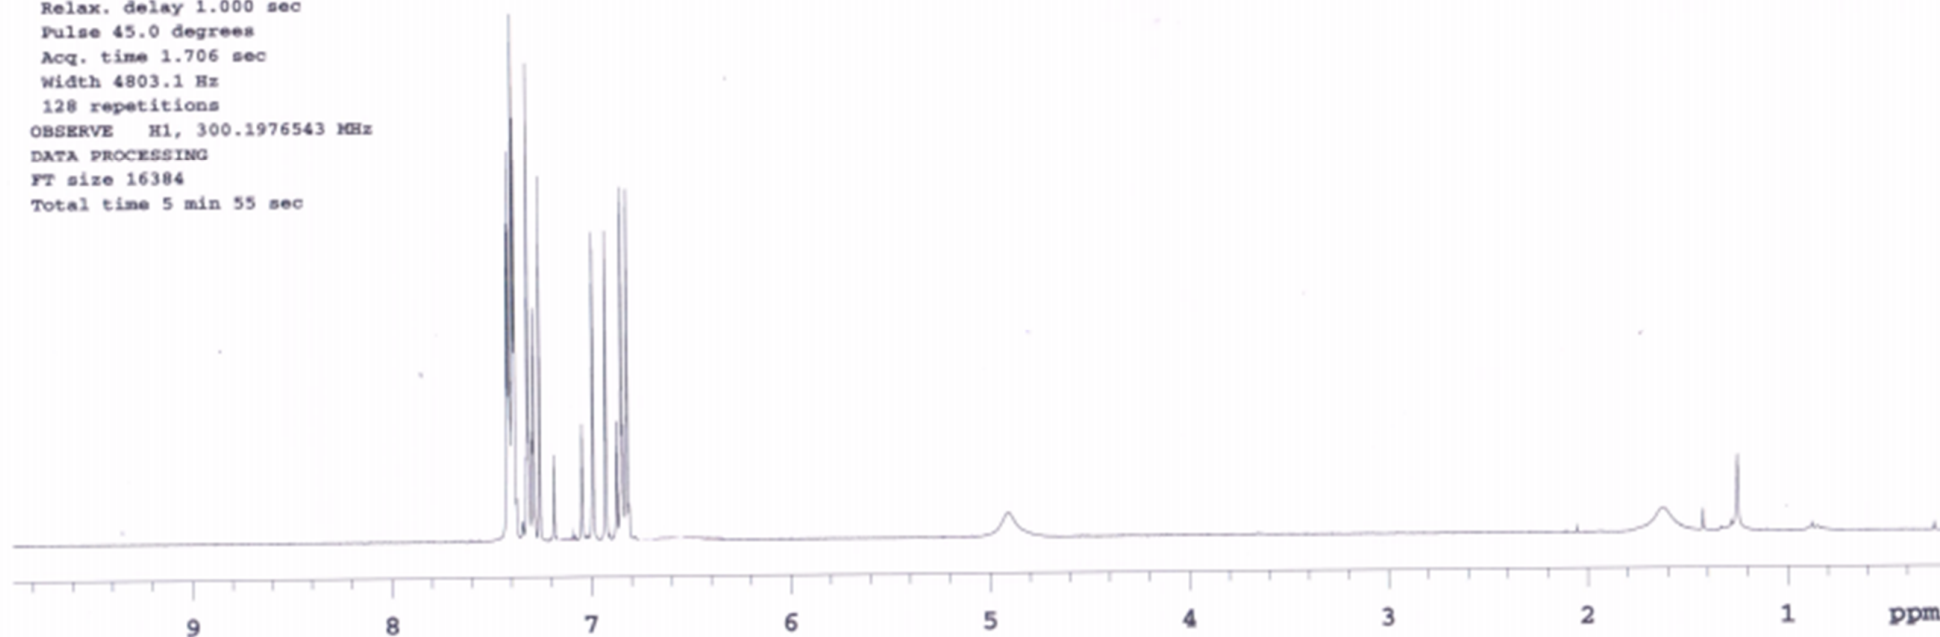

DF1277A

Sample Name:  
DF1277A\_pClPhOH\_H\_  
Data Collected on:  
m300-mercury300  
Archive directory:  
/export/home/chempack/vnmrsws/data  
Sample directory:

FidFile: CARBON

Pulse Sequence: CARBON (s2pul)  
Solvent: cdc13  
Data collected on: Feb 24 2020

Operator: giampi

Relax. delay 1.000 sec  
Pulse 45.0 degrees  
Acq. time 0.868 sec  
Width 18867.9 Hz  
2463 repetitions  
OBSERVE C13, 75.4847602 MHz  
DECOUPLE H1, 300.1991980 MHz  
Power 38 dB  
continuously on  
WALTZ-16 modulated  
DATA PROCESSING  
Line broadening 0.5 Hz  
FT size 32768  
Total time 1 hr, 36 min

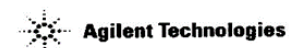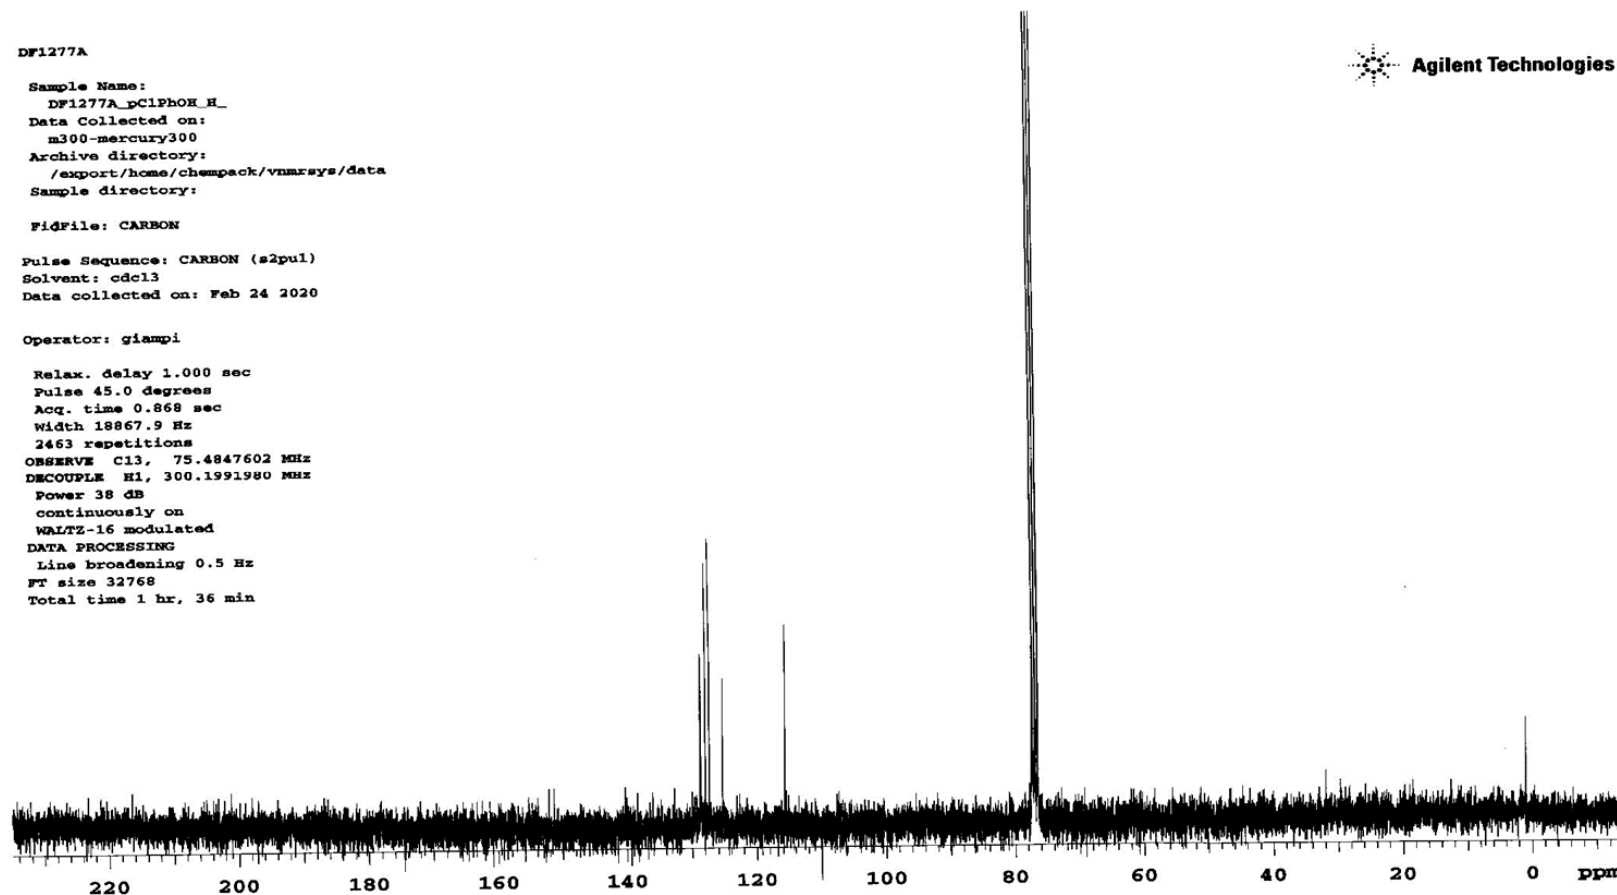

## Compound 2

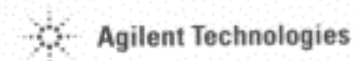

Gradient Shimming

Sample Name:  
DFS20A  
Data Collected on:  
m300-mercury300  
Archive directory:  
/export/home/chempack/vnmrsys/data  
Sample directory:

Fidfile: PROTON

Pulse Sequence: PROTON (s2pul)  
Solvent: cdcl3  
Data collected on: Mar 1 2017

Temp. 17.9 C / 291.1 K  
Operator: defil

Relax. delay 1.000 sec  
Pulse 45.0 degrees  
Acq. time 1.706 sec  
Width 4803.1 Hz  
32 repetitions  
OBSERVE H1, 300.1976543 MHz  
DATA PROCESSING  
FT size 16384  
Total time 2 min 58 sec

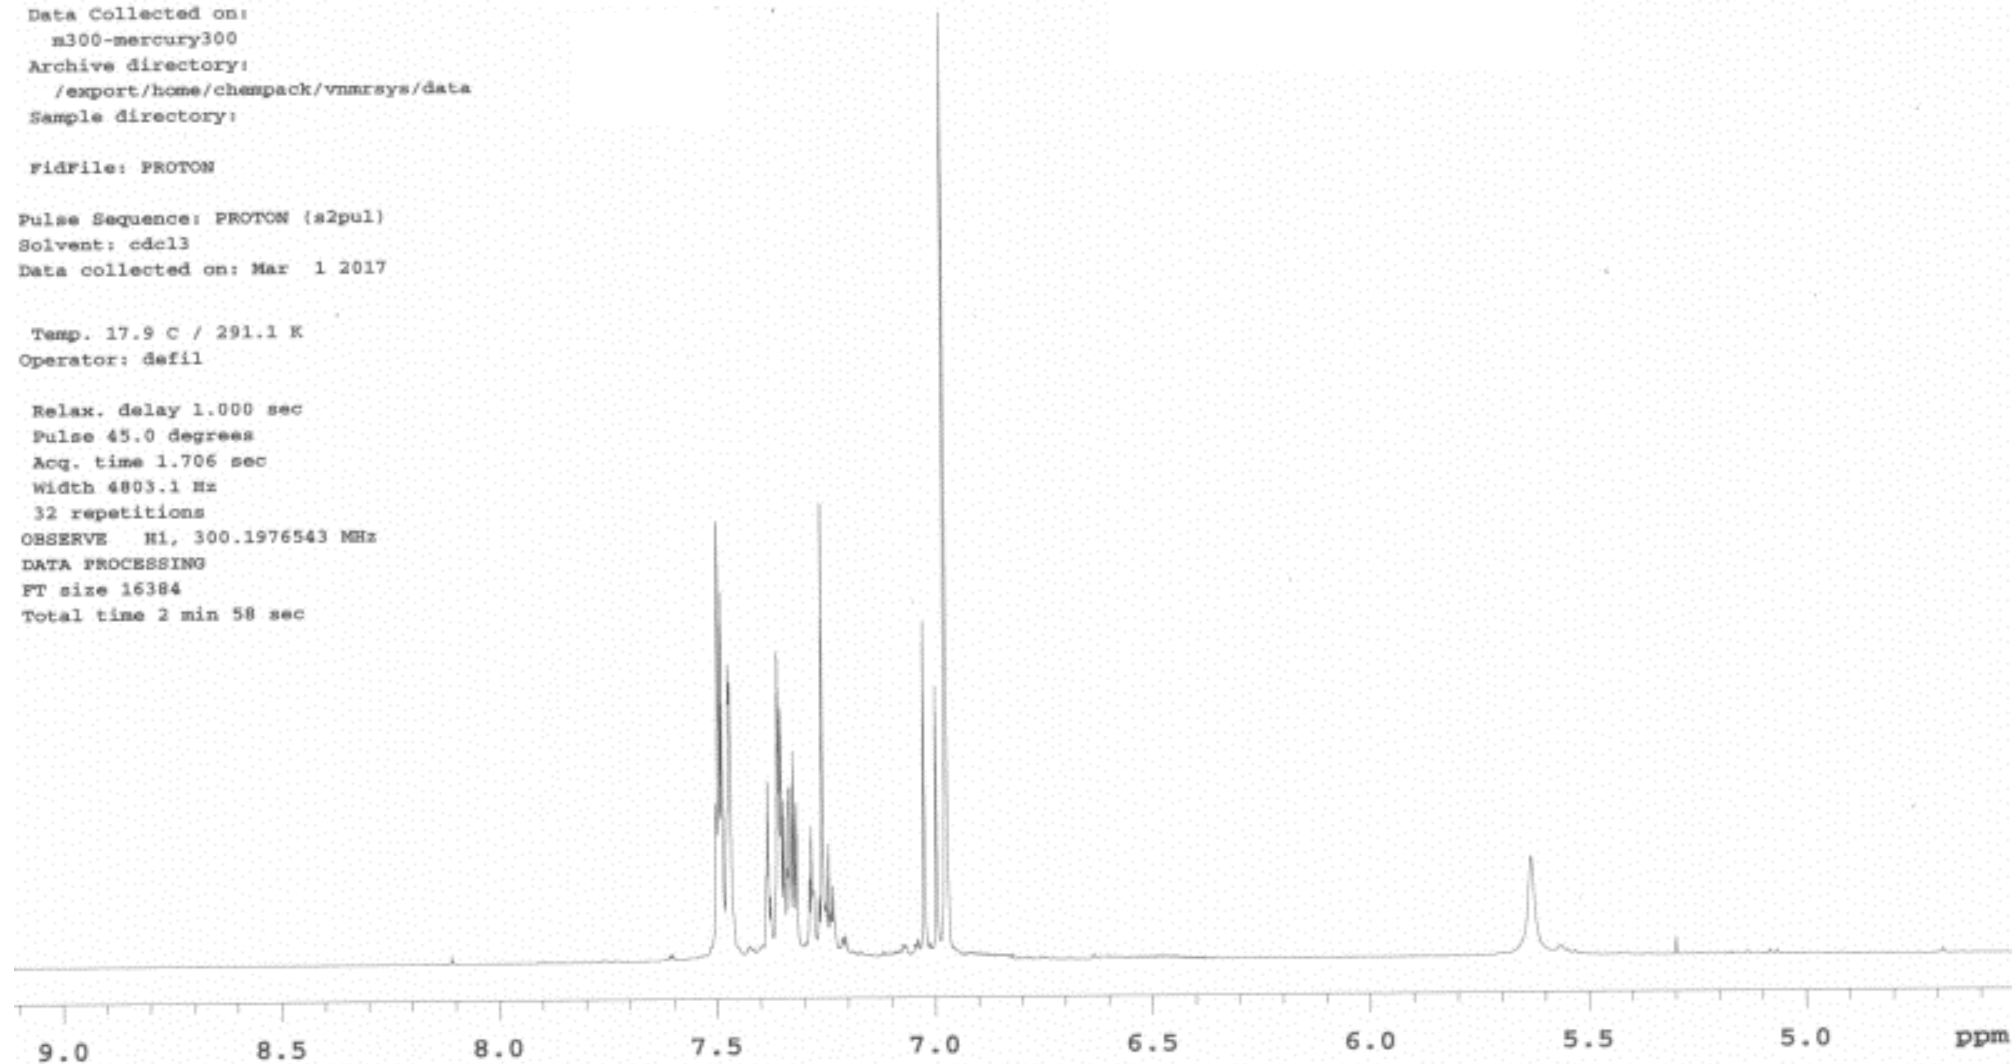

Sample Name:  
DF820A  
Data Collected on:  
m300-mercury300  
Archive directory:  
/export/home/chempack/vnmrs,--,---  
Sample directory:

FidFile: CARBON

Pulse Sequence: CARBON (s2pul)  
Solvent: cdcl3  
Data collected on: Mar 1 2017

Temp. 25.0 C / 298.1 K  
Operator: defil

Relax. delay 1.000 sec  
Pulse 45.0 degrees  
Acq. time 0.868 sec  
Width 18867.9 Hz  
500 repetitions  
OBSERVE C13, 75.4847602 MHz  
DECOUPLE H1, 300.1991980 MHz  
Power 38 dB  
continuously on  
WALTZ-16 modulated  
DATA PROCESSING  
Line broadening 0.5 Hz  
FT size 32768  
Total time 16 min

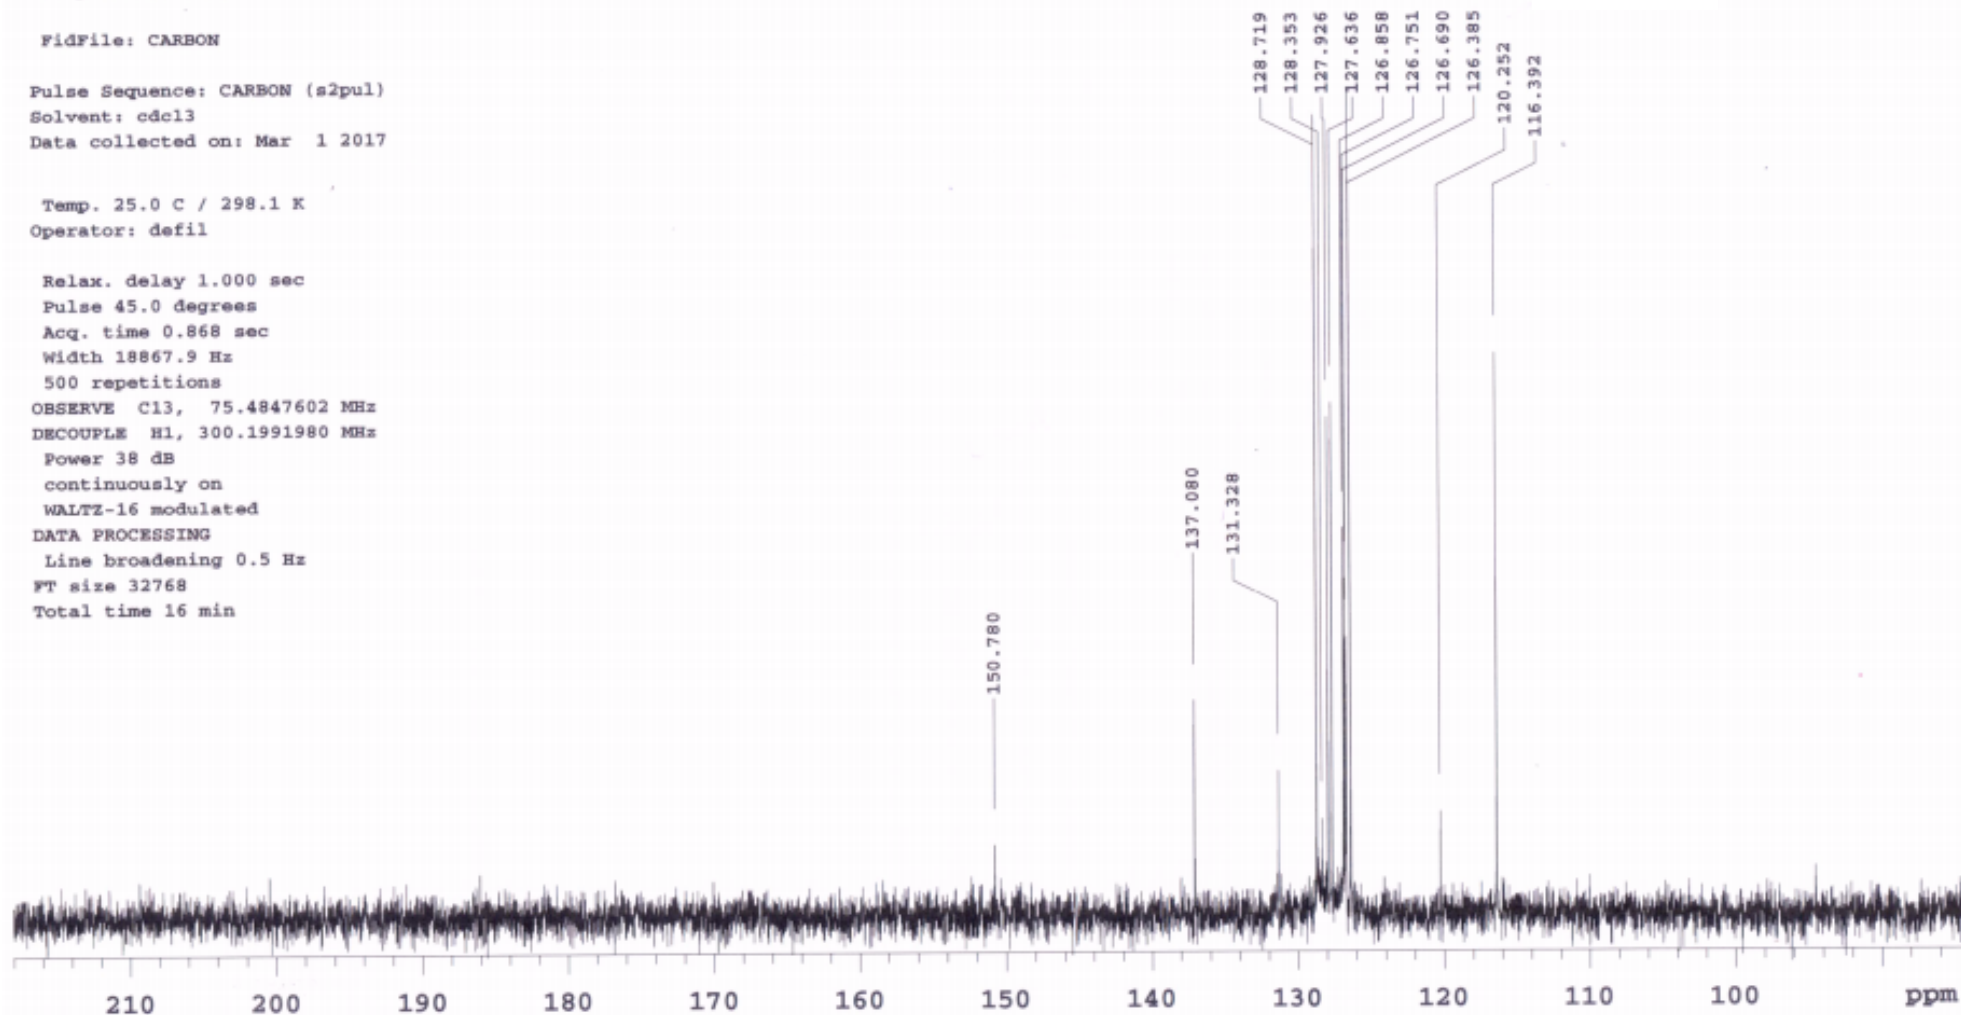

## Gradient Shimming

## Compound 3

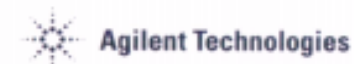

Sample Name:  
DF813A\_2-SC1  
Data Collected on:  
m300-mercury300  
Archive directory:  
/export/home/chempack/vnmrsys/data  
Sample directory:

FidFile: PROTON

Pulse Sequence: PROTON (s2pul)  
Solvent: cdcl3  
Data collected on: Feb 23 2017

Temp. 25.0 C / 298.1 K  
Operator: defil

Relax. delay 1.000 sec  
Pulse 45.0 degrees  
Acq. time 1.706 sec  
Width 4803.1 Hz  
64 repetitions  
OBSERVE H1, 300.1976543 MHz  
DATA PROCESSING  
FT size 16384  
Total time 2 min 58 sec

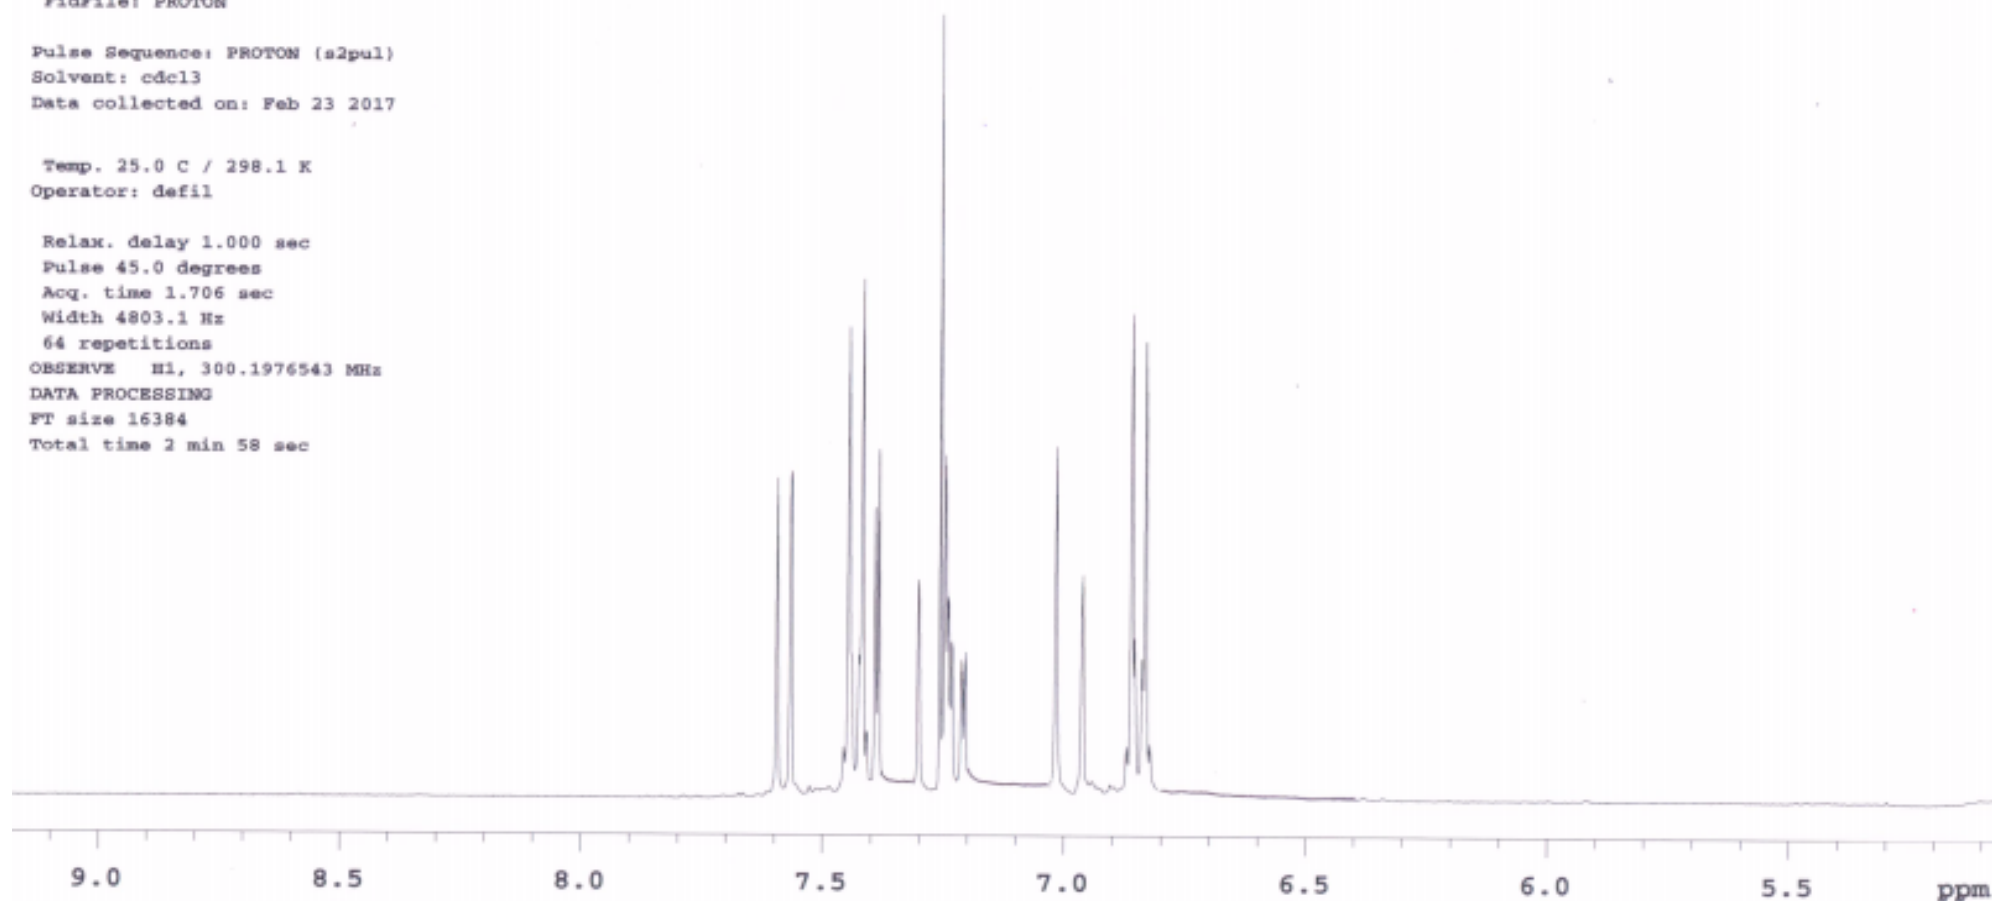

DF1279 A  
saved in GL

Sample Name:  
DF1279A\_diClPhOH\_H\_  
Data Collected on:  
m300-mercury300  
Archive directory:  
/export/home/chempack/vnmrsys/data  
Sample directory:

FidFile: CARBON

Pulse Sequence: CARBON (s2pul)  
Solvent: cdcl3  
Data collected on: Feb 12 2020

Operator: giampi

Relax. delay 1.000 sec  
Pulse 45.0 degrees  
Acq. time 0.868 sec  
Width 18867.9 Hz  
1400 repetitions  
OBSERVE C13, 75.4847602 MHz  
DECOUPLE H1, 300.1991980 MHz  
Power 38 dB  
continuously on  
WALTZ-16 modulated  
DATA PROCESSING  
Line broadening 0.5 Hz  
FT size 32768  
Total time 45 min

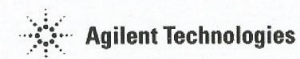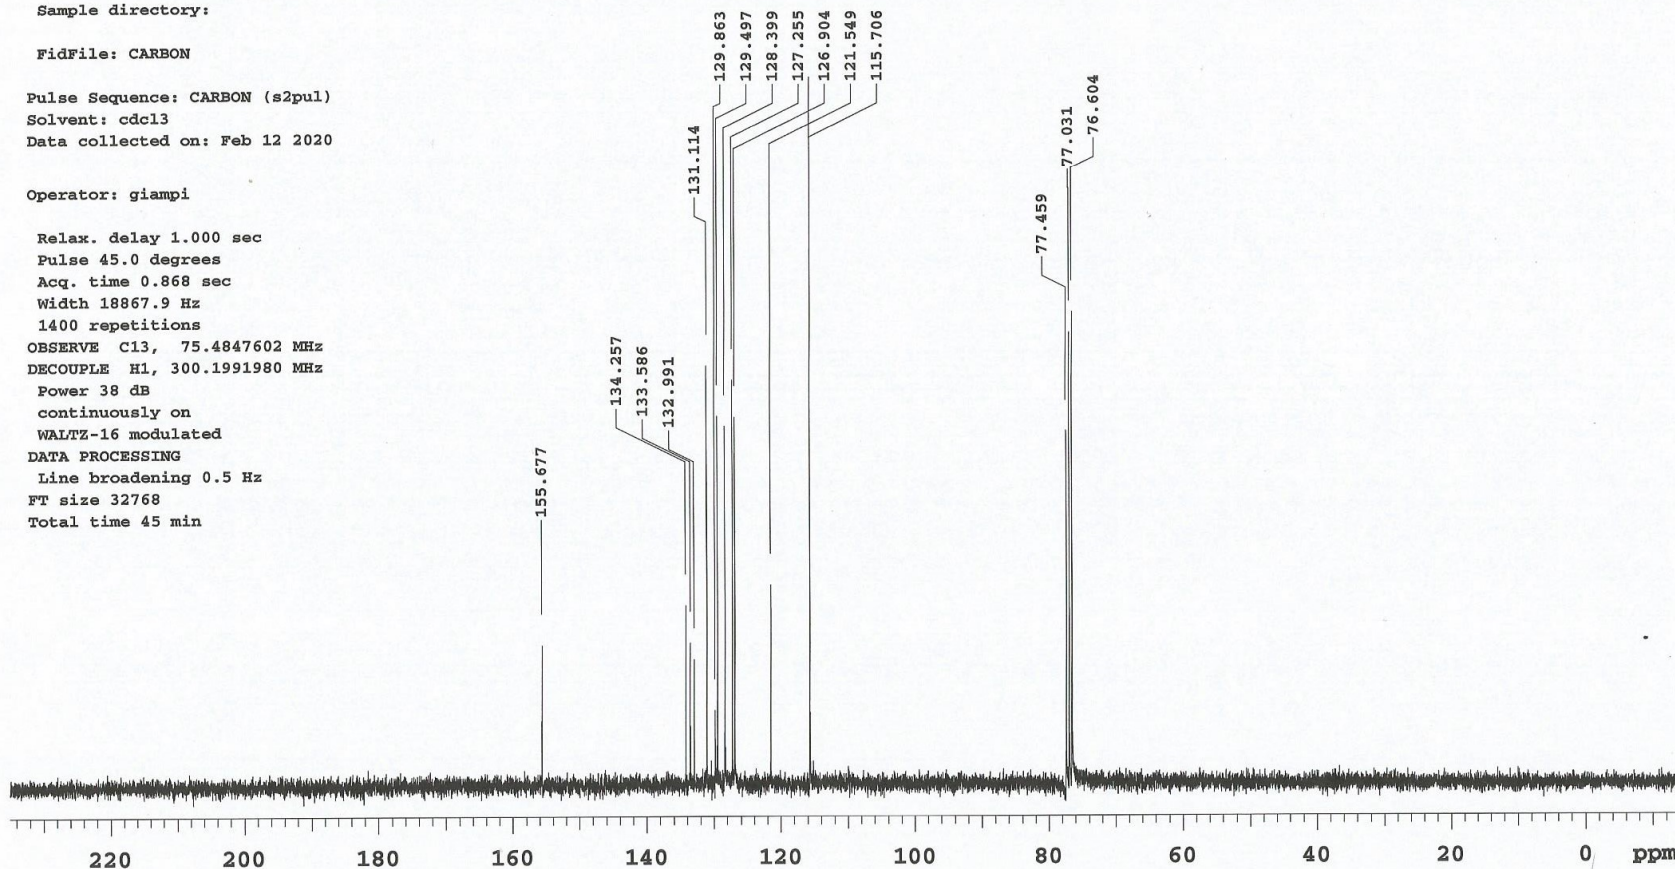

**Compound 4**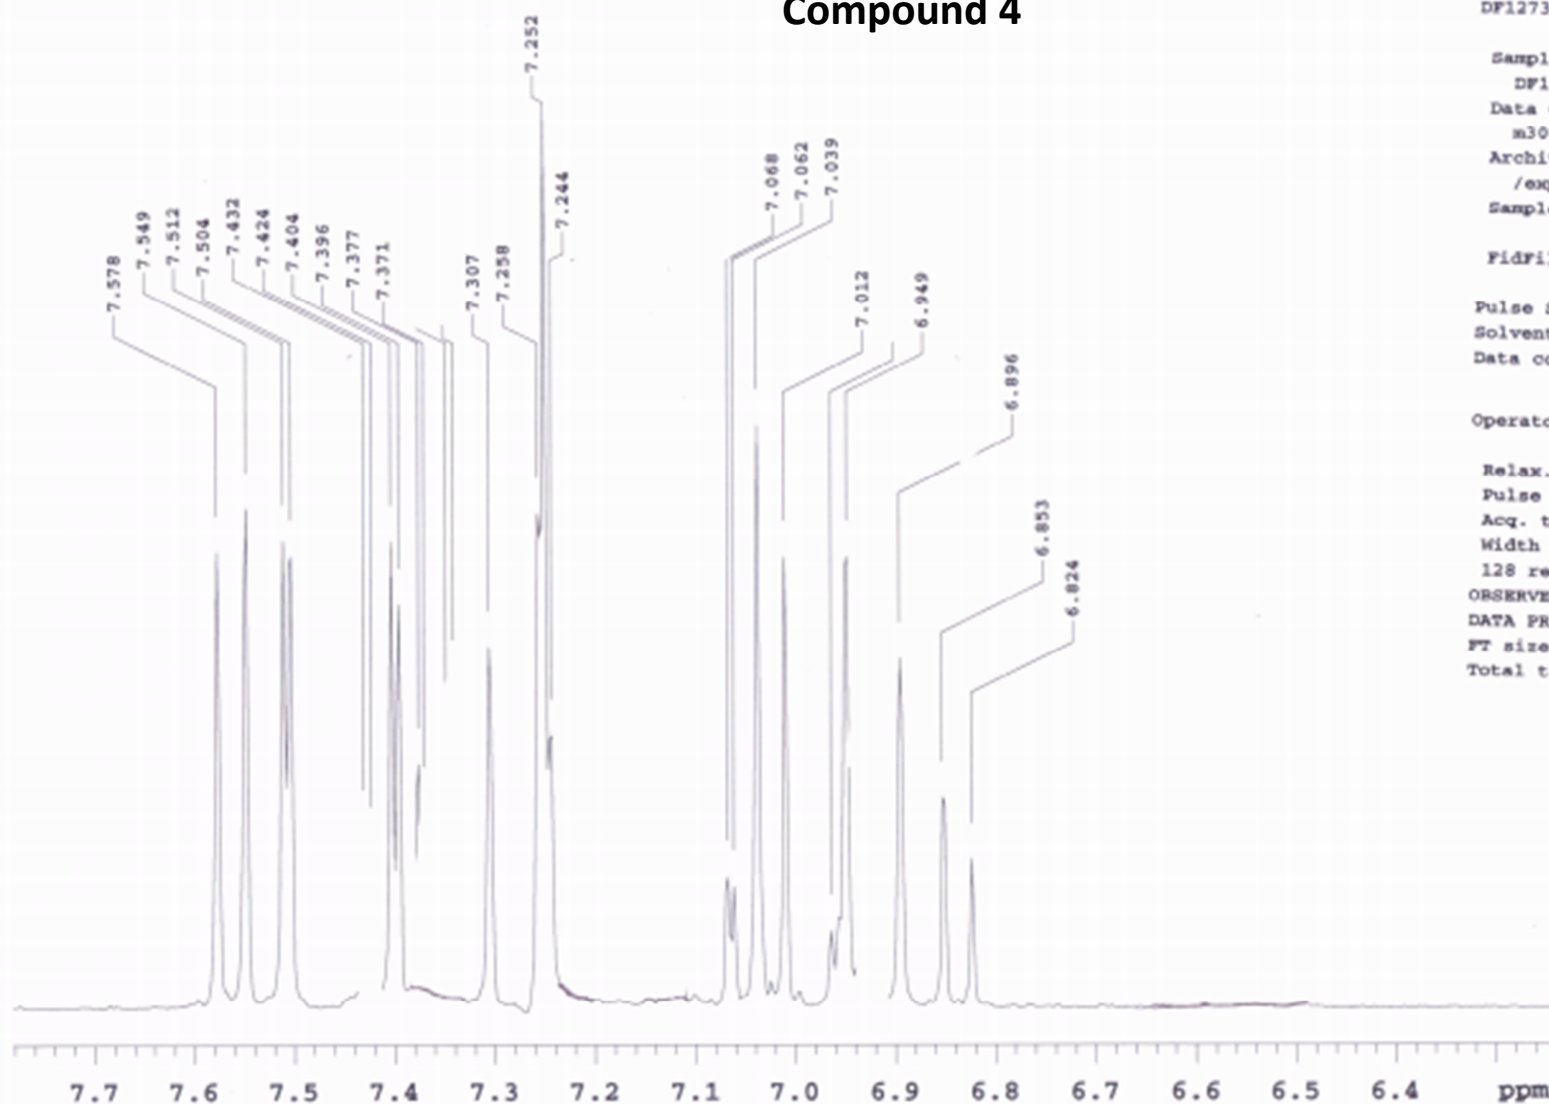

DF1273A 2 spettro

Sample Name:

DF1273A

Data Collected on:

m300-mercury300

Archive directory:

/export/home/champack/vnarsys/data

Sample directory:

FidFile: PROTON

Pulse Sequence: PROTON (s2pul)

Solvent: cdcl3

Data collected on: Feb 13 2020

Operator: giampi

Relax. delay 1.000 sec

Pulse 45.0 degrees

Acq. time 1.706 sec

Width 4803.1 Hz

128 repetitions

OBSERVE H1, 300.1976543 MHz

DATA PROCESSING

FT size 16384

Total time 5 min 55 sec

DF1273A 2 spettro (C) saved in GL

Sample Name:  
DF1273A  
Data Collected on:  
m300-mercury300  
Archive directory:  
/export/home/chempack/vnmrsys/data  
Sample directory:

Fidfile: CARBON

Pulse Sequence: CARBON (a2pul)  
Solvent: cdcl3  
Data collected on: Feb 13 2020

Operator: giampi

Relax. delay 1.000 sec  
Pulse 45.0 degrees  
Acq. time 0.868 sec  
Width 18867.9 Hz  
1600 repetitions  
OBSERVE C13, 75.4847602 MHz  
DECOUPLE H1, 300.1991980 MHz  
Power 38 dB  
continuously on  
WALTZ-16 modulated  
DATA PROCESSING  
Line broadening 0.5 Hz  
FT size 32768  
Total time 51 min

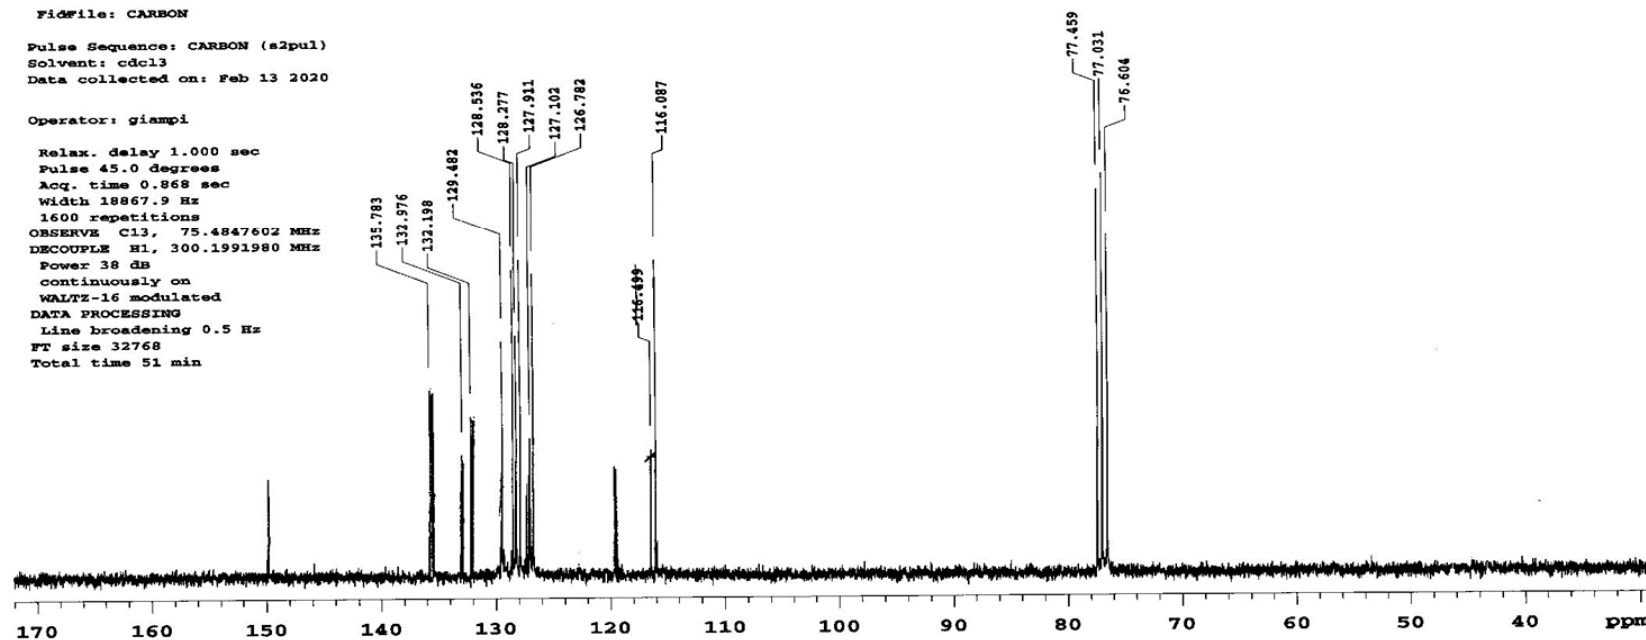

**Compound 5**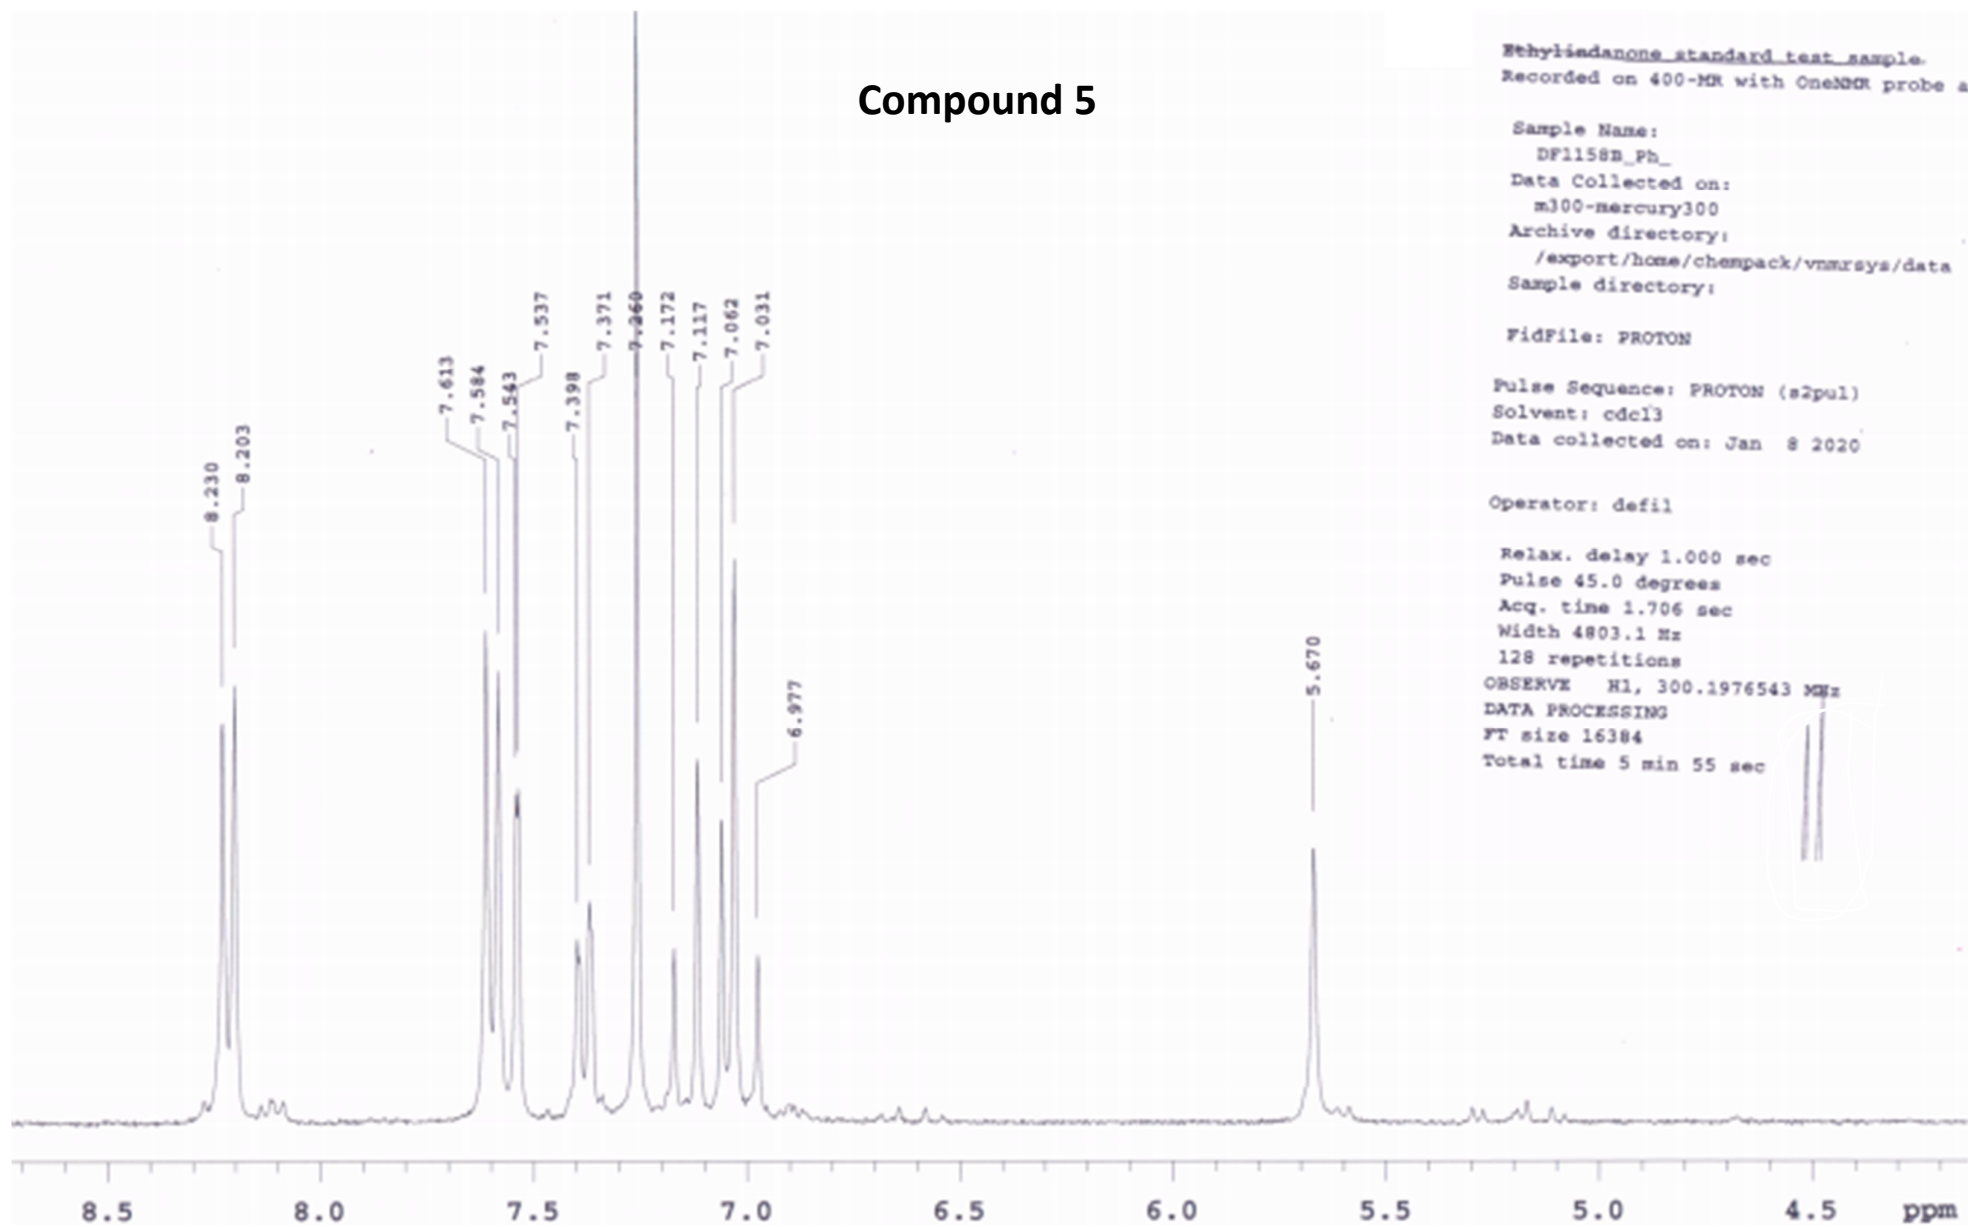

Ethylindanone\_standard\_test\_sample  
Recorded on 400-MR with OneNMR probe an

Sample Name:  
DF1158B\_Ph\_  
Data Collected on:  
m300-mercury300  
Archive directory:  
/export/home/chempack/vnmrsys/data  
Sample directory:

FidFile: PROTON

Pulse Sequence: PROTON (s2pul)  
Solvent: cdcl3  
Data collected on: Jan 8 2020

Operator: defil

Relax. delay 1.000 sec  
Pulse 45.0 degrees  
Acq. time 1.706 sec  
Width 4803.1 Hz  
128 repetitions  
OBSERVE H1, 300.1976543 MHz  
DATA PROCESSING  
FT size 16384  
Total time 5 min 55 sec

Gradient: Shimming

Sample Name:  
DF1094A  
Data Collected on:  
m300-mercury300  
Archive directory:  
/export/home/champack/mercury/data  
Sample directory:

File: PROTON

Pulse Sequence: PROTON (a2pul)  
Solvent: cdcl3  
Data collected on: Feb 23 2017

Temp. 25.0 C / 298.1 K  
Operator: dafil

Relax. delay 1.000 sec  
Pulse 45.0 degrees  
Acq. time 1.706 sec  
Width 4803.1 Hz  
64 repetitions  
OBSERVE H1, 300.1976943 MHz  
DATA PROCESSING  
FT size 16384  
Total time 2 min 58 sec

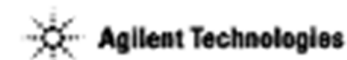

## Compound 6

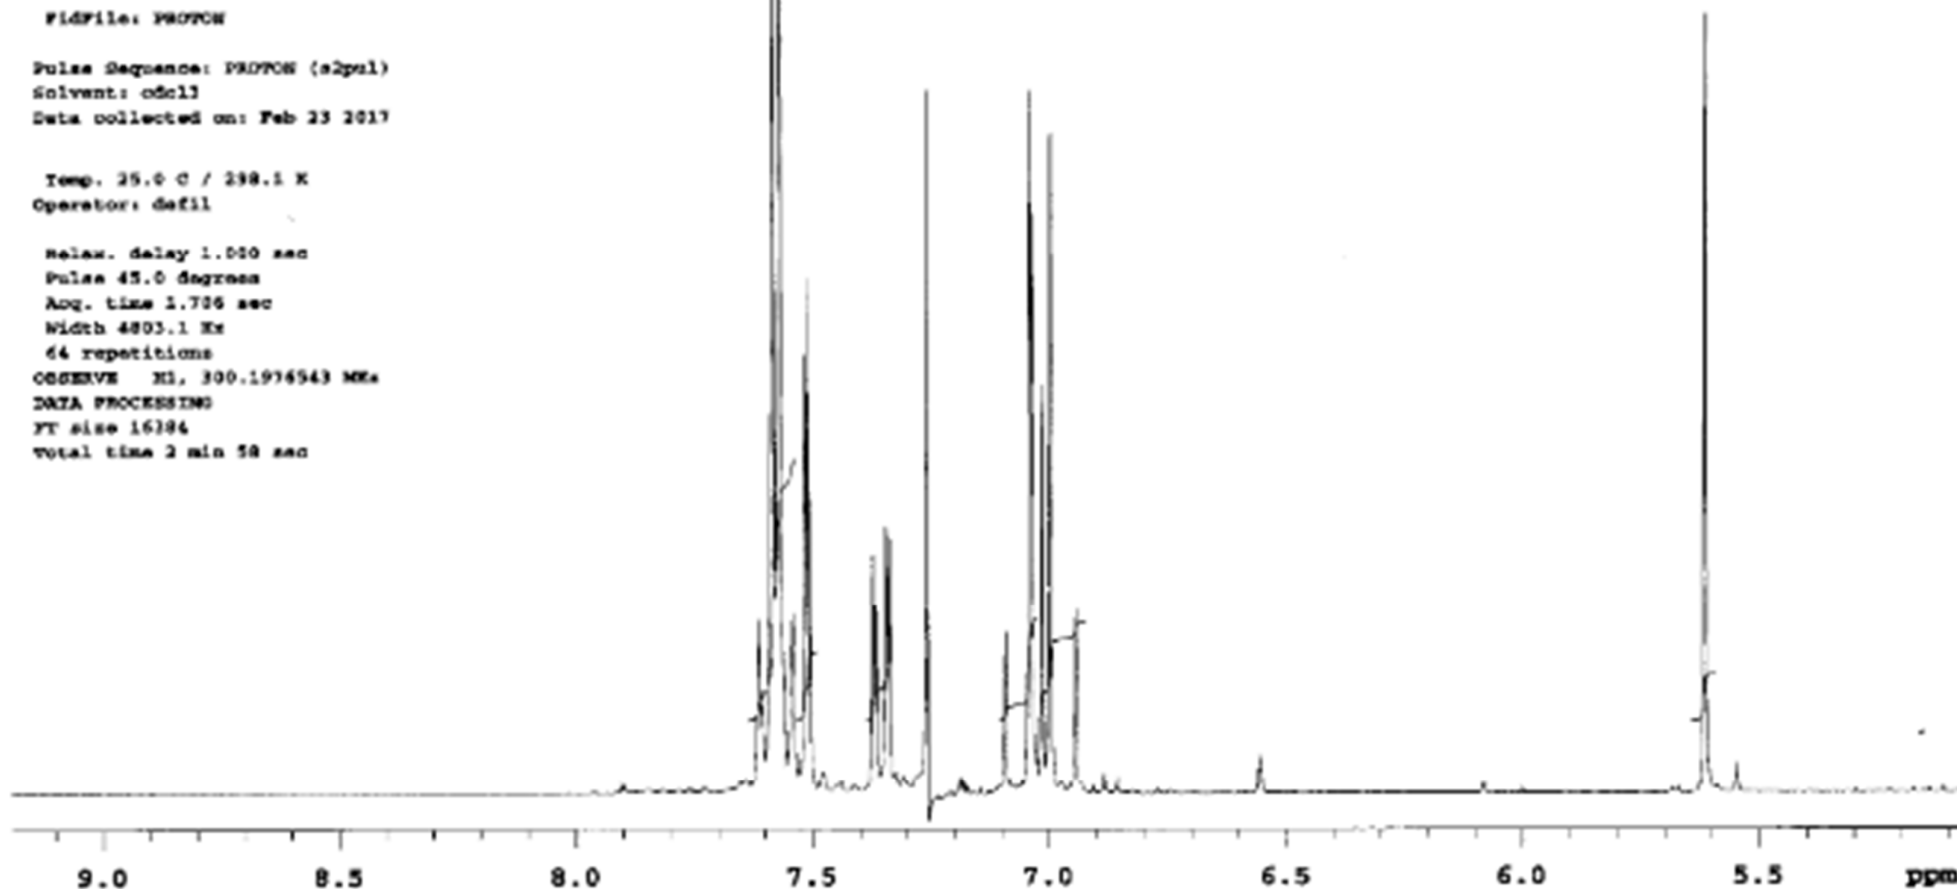

## Gradient Shimless

Sample Name:

DF1094A

Data Collected on:

M300-Mercury300

Archive directory:

/export/home/chempack/vms/sv4/data

Sample directory:

FidFile: CANNON

Pulse Sequence: CANNON (a2pul)

Solvent: c6d13

Data collected on: Feb 27 2017

Temp. 25.0 C / 298.1 K

Operator: defil

Relax. delay 1.000 sec

Pulse 45.0 degrees

Acq. time 0.868 sec

Width 18867.9 Hz

600 repetitions

CROSSPUL C13, 75.4047602 MHz

pCROSSPUL H1, 300.1351980 MHz

Power 30 dB

continuously on

WALTZ-16 modulated

DATA PROCESSING

Line broadening 0.5 Hz

FT size 32768

Total time 19 min

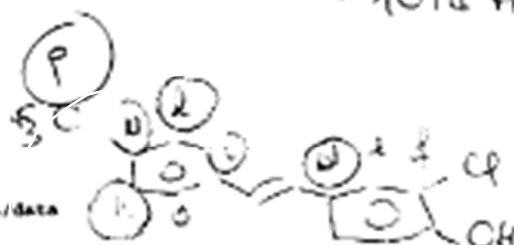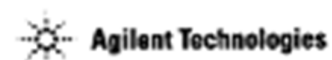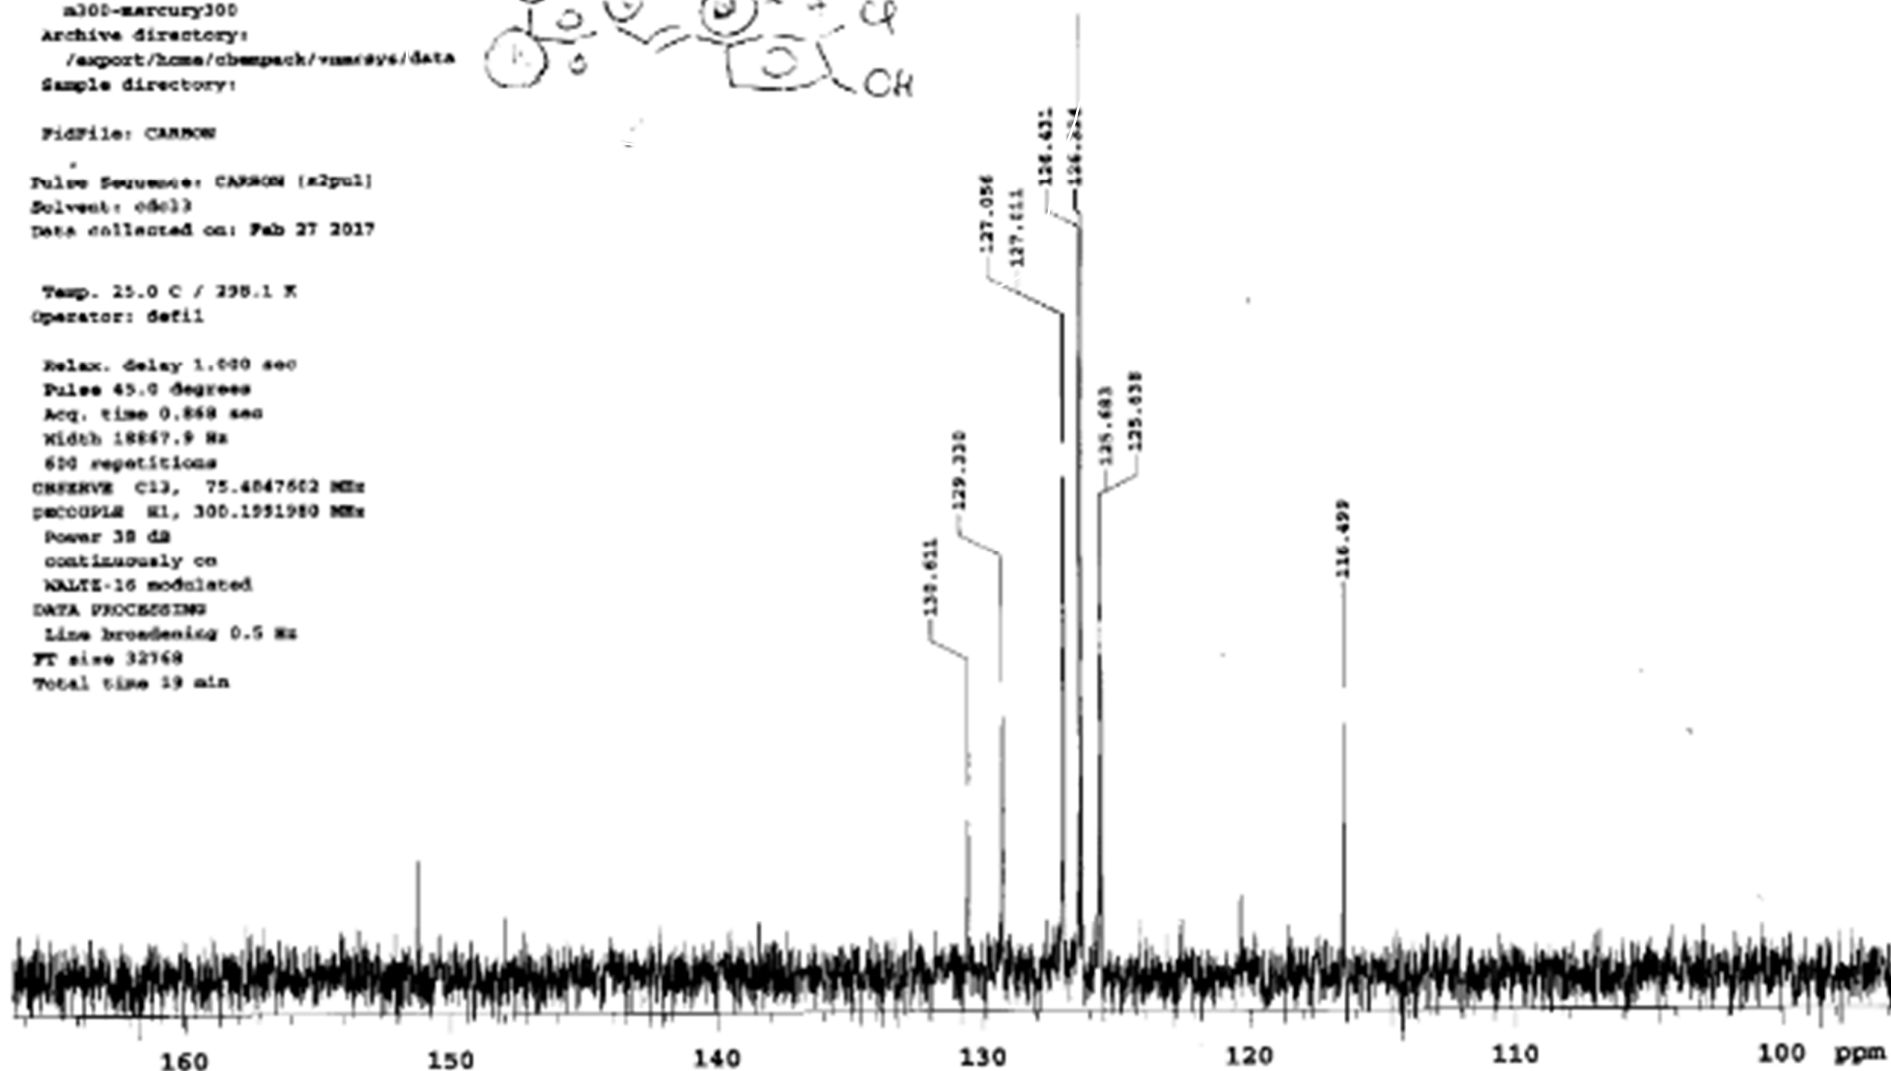

DF1278A

Sample Name:  
DF1278A\_CF3-SLB-H\_H\_  
Data Collected on:  
m300-mercury300  
Archive directory:  
/export/home/chempack/vnmrsys/data  
Sample directory:

## Compound 7

Fidfile: PROTON

Pulse Sequence: PROTON (s2pul)  
Solvent: acetone  
Data collected on: Mar 11 2020

Temp. 20.4 C / 293.6 K  
Operator: giampi

Relax. delay 1.000 sec  
Pulse 45.0 degrees  
Acq. time 1.706 sec  
Width 4803.1 Hz  
64 repetitions  
OBSERVE H1, 300.1992123 MHz  
DATA PROCESSING  
FT size 16384  
Total time 5 min 55 sec

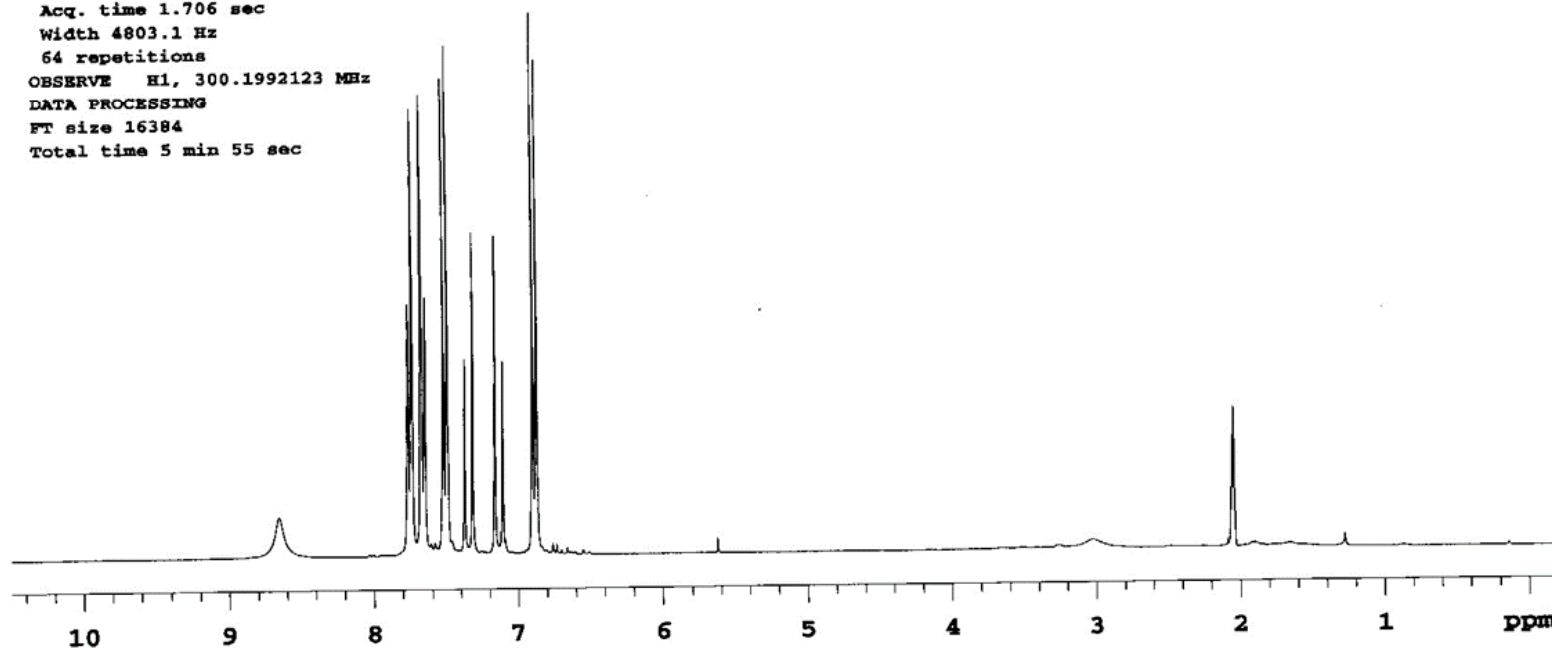

DF1278A

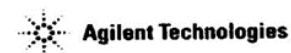

Sample Name:  
DF1278A\_CF3-SLB-H\_H\_  
Data Collected on:  
m300-mercury300  
Archive directory:  
/export/home/chempack/vnmrsys/data  
Sample directory:

FidFile: CARBON

Pulse Sequence: CARBON (s2pul)  
Solvent: acetone  
Data collected on: Mar 11 2020

Operator: giampi

Relax. delay 1.000 sec  
Pulse 45.0 degrees  
Acq. time 0.868 sec  
Width 18867.9 Hz  
1847 repetitions  
OBSERVE C13, 75.4851520 MHz  
DECOUPLE H1, 300.2007561 MHz  
Power 38 dB  
continuously on  
WALTZ-16 modulated  
DATA PROCESSING  
Line broadening 0.5 Hz  
FT size 32768  
Total time 1 hr, 4 min

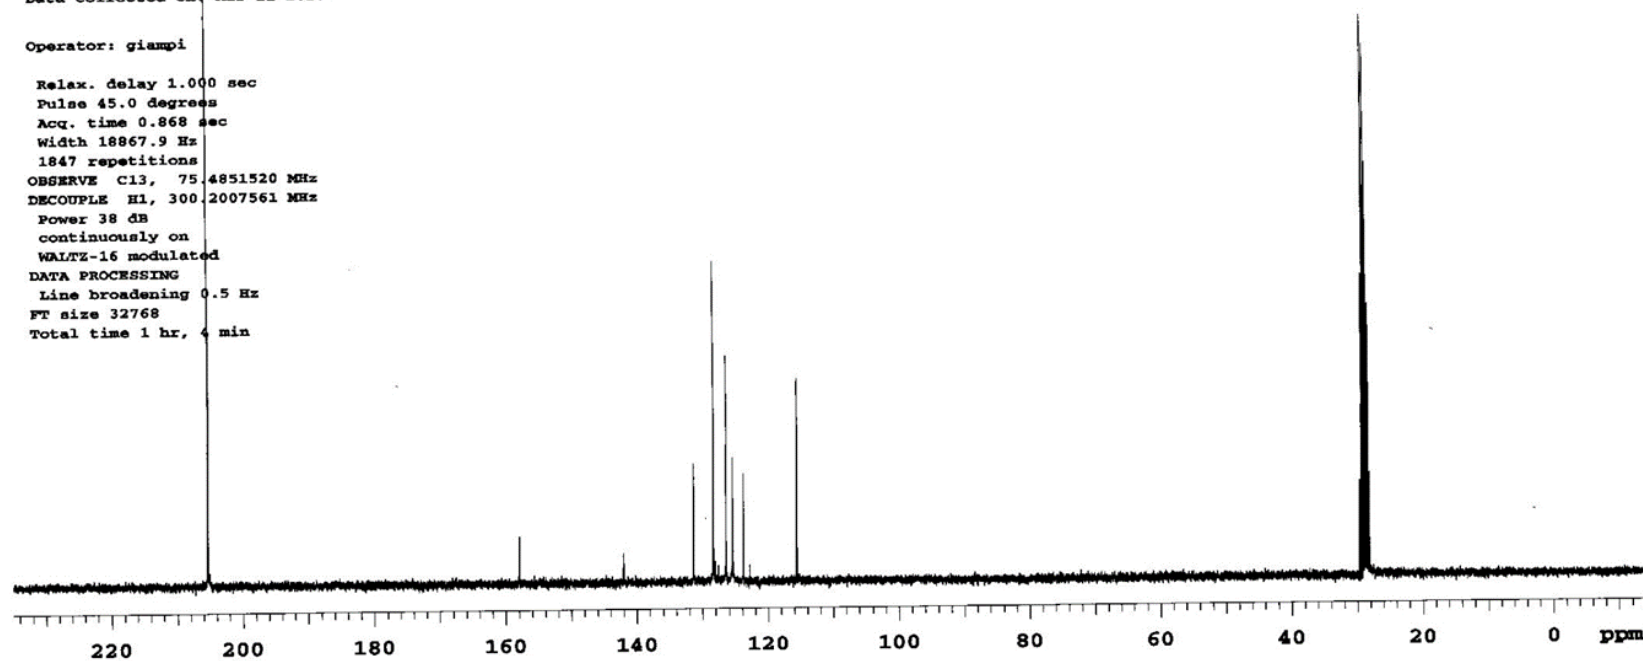

Supplement: s1 [file s1]
